# Supplementary material for: Inhibition of NHEJ repair by type II-A CRISPR-Cas systems in bacteria
Source: PubMed Central journal article supplement (PMC5727150; doi:10.1038/s41467-017-02350-1), 2017-12-12
Supplement: 41467_2017_2350_MOESM3_ESM.pdf [file 41467_2017_2350_MOESM3_ESM.pdf]

## **Description of Additional Supplementary Files**

File Name: Supplementary Data 1

Description: Number of Type II CRISPR-Cas systems and NHEJ systems in bacterial and archaeal genomes
